# Supplementary material
Source: Research Square preprint supplement (doi:10.21203/rs.3.rs-9782604/v1)
Supplement: Supplementary file 1 [file c8d0d9fb87a02da5a2ef9fb9.pdf]

1           Supplementary for the Paper: Multiphasic  
2           Transport in the Human Cranial Dura: How  
3           Meningeal Lymphatic Vessels Drive Waste  
4           Clearance from Brain Cerebrospinal Fluid

5           Alberto Girelli<sup>1\*</sup>, Andreas Solheim<sup>1,6</sup>, Kaja Nordengen<sup>2,3</sup>,  
6           Trygve Holck Storås<sup>3,4,7</sup>, Sofie Lysholm Lian<sup>5</sup>, Kent-Andre  
7           Mardal<sup>1,6,7</sup>

8           <sup>1</sup>Department of Numerical Analysis and Scientific Computing, Simula  
9           Research Laboratory, Norway.

10          <sup>2</sup>Department of Neurology, Akershus University Hospital, Lørenskog,  
11          Lørenskog, Norway.

12          <sup>3</sup>Institute of Clinical Medicine, University of Oslo, Oslo, Norway.

13          <sup>4</sup>Department of Physics and Computational Radiology, Division of  
14          Radiology and Nuclear Medicine, Oslo University Hospital, Oslo,  
15          Norway.

16          <sup>5</sup>Oslo University Hospital, Oslo, Norway.

17          <sup>6</sup>Department of Mathematics, University of Oslo, Moltke Moes vei 35,  
18          Oslo, 0851, Norway.

19          <sup>7</sup> K.G. Jebsen Centre for Brain Fluid Research, University of Oslo, Pb  
20          1072 Blindern, Oslo, 0316, Norway.

21           \*Corresponding author(s). E-mail(s): [alberto@simula.no](mailto:alberto@simula.no);  
22           Contributing authors: [solheim@simula.no](mailto:solheim@simula.no); [kaja.nordengen@gmail.com](mailto:kaja.nordengen@gmail.com);  
23           [tstoras@uio.no](mailto:tstoras@uio.no); [Sofie.lysholm.lian@gmail.com](mailto:Sofie.lysholm.lian@gmail.com); [kent-and@simula.no](mailto:kent-and@simula.no);

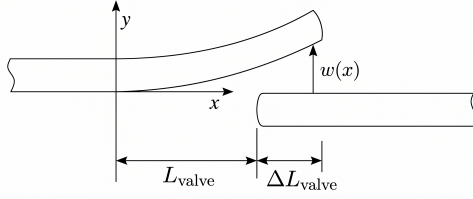

**Fig. A:** Schematic representation of the lymphatic valve [1]

## 24 **A mLV Valve Model**

25 We use the model of [1] to obtain an explicit solution of the valve opening of initial  
 26 lymphatics and consequently estimate the flow passing through this valve. The single  
 27 primary lymphatic valve is formed by an overlapping endothelial flap of length  $L_{\text{valve}}$   
 28 (free portion) (see Figure A). The flap behaves as an Euler–Bernoulli beam clamped  
 29 at  $x = 0$  and free at  $x = L_{\text{valve}} + \Delta L_{\text{valve}}$ . We assume a constant trans-wall pressure  
 30 difference  $\Delta p$  to obtain the explicit solution.

31 The beam equation is

$$EI w''''(x) = \Delta p, \quad (1)$$

32 with boundary conditions

$$w(0) = 0, \quad w'(0) = 0, \quad w''(L_{\text{valve}} + \Delta L_{\text{valve}}) = 0, \quad w'''(L_{\text{valve}} + \Delta L_{\text{valve}}) = 0. \quad (2)$$

33 Solving

$$w(x) = \frac{\Delta p}{24 EI} x^2 (x^2 - 4(L_{\text{valve}} + \Delta L_{\text{valve}})x + 6(L_{\text{valve}} + \Delta L_{\text{valve}})^2), \quad 0 \leq x \leq L_{\text{valve}} + \Delta L_{\text{valve}}. \quad (3)$$

34 We consider steady, incompressible flow between two plates separated by the height  
 35  $w(x)$ . Let  $\mu$  be the dynamic viscosity,  $T$  the valve depth, and  $Q$  the volumetric flow  
 36 rate.

37 The lubrication equation is

$$\frac{dp}{dx} = -\frac{12\mu q}{w(x)^3} = -\frac{12\mu Q}{T w(x)^3}. \quad (4)$$

38 If we assume a constant pressure gradient, it follows that

$$Q = \frac{\Delta P w^3(x) T}{12 L_{\text{valve}} \mu}, \quad (5)$$

39 taking the average over  $x$ , we have:

$$\bar{Q} = \frac{\Delta P T}{12 L_{\text{valve}}^2 \mu} \int_0^{L+\Delta L} w^3(x) dx \equiv Q_{\text{valve}}. \quad (6)$$

40 From [2], the permeability relation can be written as

$$L_p = \frac{Q_{\text{prod}}}{S_{\text{mLV}} \Delta p}. \quad (7)$$

41 At the *microscale*, we apply (7) to a single primary lymphatic valve:

$$L_{p,\text{micro}} = \frac{Q_{\text{valve}}}{S_{\text{valve}} \Delta p}, \quad (8)$$

42 where  $S_{\text{valve}}$  is the local valve surface area.

43 Then we have that the estimated number of valves can be computed by

$$N_{\text{valve}} = \frac{Q_{\text{prod}}}{Q_{\text{valve}}}. \quad (9)$$

44 It follows that we can write the following surface-area fraction

$$\phi_{\text{valve}} = \frac{N_{\text{valve}} S_{\text{valve}}}{S_{\text{mLV}}}, \quad (10)$$

45 and we have

$$L_p = \phi_{\text{valve}} L_{p,\text{micro}}. \quad (11)$$

46 Similarly, the structural model of the valve opening can be extended to estimate  
 47 the molecular permeability  $P_{\text{lymph}}$ . We consider the transport of a solute across the  
 48 valve governed by both diffusion and advection. At the microscale, the local solute  
 49 flux  $J(x)$  (molar or mass rate) through the cross-section  $A(x) = w(x)T$  is described  
 50 by Fick's first law and the convective contribution:

$$J(x) = -DTw(x)\frac{dC}{dx} + (1 - \sigma)Q_{\text{valve}}C(x), \quad (12)$$

51 where  $D$  is the diffusion coefficient of the solute in the lymph and  $\sigma$  is the reflection  
 52 coefficient. For the open valve configuration where  $w(x)$  is significantly larger than the  
 53 solute's molecular radius, we assume  $\sigma \approx 0$ .

54 To obtain an explicit solution for the effective molecular permeability, we consider  
 55 a steady-state concentration difference  $\Delta C = C_i - C_L$ , where  $C_i$  is the interstitial  
 56 concentration and  $C_L$  is the concentration in the lymphatic lumen. Under the phys-  
 57 iological assumption of a *sink condition* in the lymphatic vessels, where the solute is  
 58 rapidly cleared by the flow, we set  $C_L = 0$  and  $\Delta C = C_i$ .

59 The total solute flux passing through a single primary valve,  $J_{\text{valve}}$ , is the sum of  
 60 the diffusive and advective components:

$$J_{\text{valve}} = J_{\text{diff}} + J_{\text{adv}} = \left( \frac{DT}{\int_0^{L_{\text{valve}} + \Delta L_{\text{valve}}} \frac{1}{w(x)} dx} \right) \Delta C + Q_{\text{valve}} \bar{C}, \quad (13)$$

61 where  $\bar{C}$  is the average concentration of the solute in the trans-valve flow. Under the  
 62 sink condition  $C_L = 0$  and assuming the fluid enters the valve from the interstitium,  
 63 we have  $\bar{C} = C_i = \Delta C$ .

64 We define the microscale effective molecular permeability as:

$$P_{\text{micro,eff}} = \frac{J_{\text{valve}}}{S_{\text{valve}}\Delta C} = P_{\text{micro,diff}} + \frac{Q_{\text{valve}}}{S_{\text{valve}}}, \quad (14)$$

65 where  $P_{\text{micro,diff}}$  is the purely diffusive permeability obtained from the integral of the  
66 inverse gap height  $1/w(x)$ .

67 Finally, applying the same upscaling framework used for the hydraulic permeabil-  
68 ity, the macroscale effective molecular permeability  $P_{\text{eff}}$  of the lymphatic vessel wall  
69 is given by:

$$P_{\text{eff}} = \phi_{\text{valve}}P_{\text{micro,eff}}. \quad (15)$$

70 Substituting the surface-area fraction  $\phi_{\text{valve}}$ , we obtain the final relation:

$$P_{\text{eff}} = \phi_{\text{valve}}P_{\text{micro,diff}} + \frac{Q_{\text{flux}}}{S_{\text{mLV}}}, \quad (16)$$

71 where  $Q_{\text{flux}}$  is the net volumetric drainage of the network. This formulation allows us  
72 to estimate the total solute clearance  $F_{\text{solute}} = P_{\text{eff}}S_{\text{mLV}}C_i$  directly from the structural  
73 parameters of the Mendoza model.

## 74 A.1 QMC Analysis

75 The QMC simulation is based on 60 million samples. The validity of each parameter  
76 set was evaluated against a multi-objective cost function. The algorithm minimizes  
77 the cumulative relative error between the model outputs and two specific physiological  
78 targets:

- 79 1. **Net Lymphatic Flux ( $Q_{\text{flux}}$ ):** The drainage capacity of the network. We set as  
80 target the production rate of  $0.5 \text{ L/day} \approx 5.8 \times 10^{-9} \text{ m}^3/\text{s}$  [3] against our computed  
81 total  $Q_{\text{flux}} = -L_p S_{\text{mLV}} \Delta P_{\text{at}}$ .

82 **2. Total Vascular Volume:** The volume occupied by the mLVs network; we test  
83 two targets:  $V_{\text{mLV}} \approx 6 \times 10^{-6} \text{ m}^3$  [4] and  $V_{\text{mLV}} = 4.57 \times 10^{-7} \text{ m}^3$  (see Section F)  
84 against our computed volume of  $S_{\text{tot}}r/2$ .

The sampled parameters and ranges are

$$\Delta P_{\text{at}} \in [-1750, -400] \text{ Pa}, \quad L_p \in [10^{-12}, 10^{-8}] \text{ m/Pa} \cdot \text{s},$$

$$r \in [5 \times 10^{-6}, 2 \times 10^{-5}] \text{ m}, \quad L_{\text{FIX}} = L_{\text{valve}} + \Delta L_{\text{valve}} \in [5 \times 10^{-7}, 6 \times 10^{-6}] \text{ m}.$$

85 For a porosity of 0.5%, the near-optimal subset (9,207 accepted samples) yields the  
86 following mean values, 95% confidence intervals, and coefficients of variation (CV):

$$\Delta P_{\text{at}} = -6.71 \times 10^2 [-6.76 \times 10^2, -6.66 \times 10^2] \text{ Pa}, \quad (\text{CV} = 37.0\%)$$

$$L_p = 4.42 \times 10^{-10} [4.37 \times 10^{-10}, 4.46 \times 10^{-10}] \text{ m/Pa} \cdot \text{s}, \quad (\text{CV} = 48.5\%)$$

$$r = 4.02 \times 10^{-5} [4.00 \times 10^{-5}, 4.05 \times 10^{-5}] \text{ m}, \quad (\text{CV} = 34.4\%)$$

$$L_{\text{FIX}} = 6.11 \times 10^{-7} [6.09 \times 10^{-7}, 6.13 \times 10^{-7}] \text{ m}, \quad (\text{CV} = 13.2\%)$$

87 Using the confidence interval means, the derived total vessel surface area for the  
88 active network is  $S_{\text{mLV}} \approx 1.95 \times 10^{-2} \text{ m}^2$ .

89 The global sensitivity analysis (Table A) evaluates both the linear (Pearson) and  
90 monotonic nonlinear (Spearman rank) correlations to the estimated flux across the  
91 entire valid parameter space. It indicates that the net flux shows near-zero marginal  
92 correlation to individual parameters under both metrics.

93 Within this accepted near-optimal subset, strong structural correlations emerge  
94 (Figure B). Hydraulic conductivity  $L_p$  shows strong positive correlation with both  
95 radius  $r$  (0.71) and transmural pressure  $\Delta P_{\text{at}}$  (0.58), while transmural pressure also  
96 correlates positively with  $L_{\text{FIX}}$  (0.51).

**Table A:** Sensitivity Analysis (Global Correlations) - 0.5% Porosity

| Parameter              | Pearson w/ $Q_{\text{flux}}$ | Spearman w/ $Q_{\text{flux}}$ |
|------------------------|------------------------------|-------------------------------|
| $\Delta P_{\text{at}}$ | -0.0015                      | -0.0021                       |
| $L_p$                  | -0.0015                      | -0.0022                       |
| $r$                    | 0.0007                       | 0.0015                        |
| $L_{\text{FIX}}$       | -0.0004                      | -0.0011                       |

97 Conversely, for the case of 6.5% porosity, the near-optimal subset (727 accepted  
98 samples) yields the following adjusted mean values, confidence intervals, and CVs:

$$\Delta P_{\text{at}} = -6.78 \times 10^2 [-6.97 \times 10^2, -6.60 \times 10^2] \text{ Pa, } (\text{CV} = 37.1\%)$$

$$L_p = 3.28 \times 10^{-11} [3.16 \times 10^{-11}, 3.40 \times 10^{-11}] \text{ m/Pa} \cdot \text{s, } (\text{CV} = 50.0\%)$$

$$r = 3.97 \times 10^{-5} [3.87 \times 10^{-5}, 4.07 \times 10^{-5}] \text{ m, } (\text{CV} = 35.7\%)$$

$$L_{\text{FIX}} = 6.08 \times 10^{-7} [6.03 \times 10^{-7}, 6.14 \times 10^{-7}] \text{ m, } (\text{CV} = 13.2\%)$$

99 Using these corresponding CI means, the derived total vessel surface area for the  
100 active network scales up to  $S_{\text{mLV}} \approx 2.60 \times 10^{-1} \text{ m}^2$ .

101 The global sensitivity analysis for this higher porosity level (Figure B) evaluates  
102 the same metrics. Similar to the lower porosity case, it indicates that the net flux  
103 maintains a near-zero marginal correlation to individual parameters.

**Table B:** Sensitivity Analysis (Global Correlations) - 6.5% Porosity

| Parameter              | Pearson w/ $Q_{\text{flux}}$ | Spearman w/ $Q_{\text{flux}}$ |
|------------------------|------------------------------|-------------------------------|
| $\Delta P_{\text{at}}$ | -0.0018                      | -0.0035                       |
| $L_p$                  | -0.0004                      | -0.0004                       |
| $r$                    | 0.0015                       | 0.0029                        |
| $L_{\text{FIX}}$       | -0.0017                      | -0.0023                       |

104 Within this accepted near-optimal subset, strong structural correlations again  
 105 emerge (Figure B). Consistent with the 0.5% porosity case, hydraulic conductivity  $L_p$   
 106 shows a strong positive correlation with both radius  $r$  (0.73) and transmural pressure  
 107  $\Delta P_{at}$  (0.56), while transmural pressure continues to correlate with  $L_{FIX}$  (0.51).

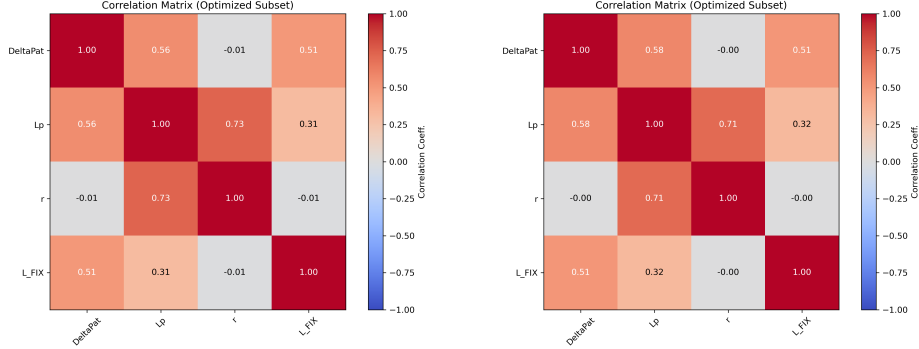

**Fig. B:** The correlation matrix of the near-optimal subset obtained from the Quasi-Monte Carlo simulation, illustrating the morphometric and mechanical trade-offs of the dural lymphatic network. **Left:** Case with porosity  $\phi_L = 6.5\%$ . **Right:** Case with porosity  $\phi_L = 0.5\%$ .

108 The global sensitivity analysis (Tables A and B) reveals that the Net Lymphatic  
 109 Flux ( $Q_{flux}$ ) exhibits near-zero marginal correlation to any individual parameter under  
 110 both linear (Pearson) and rank-based (Spearman) metrics. This is due to the fact  
 111 that ( $Q_{flux} \propto -L_p S_{mLV} \Delta P_{at}$ ), which means that the drainage capacity cannot be dic-  
 112 tated by a single "bottleneck" variable but requires the simultaneous co-optimization  
 113 of permeability ( $L_p$ ), network surface area ( $S_{mLV}$ ), and the transmural pressure gra-  
 114 dient ( $\Delta P_{at}$ ). Notably, while  $L_p$  and  $S_{mLV}$  differ significantly depending on the tissue  
 115 porosity, their product ( $L_p S_{mLV}$ ) remains consistent, emphasizing that the system  
 116 fundamentally relies on the balance between permeability and available surface area  
 117 to maintain adequate flux. The model successfully found an effective vessel average  
 118 radius of  $r \approx 39.7$  to  $40.2 \mu m$  across the two porosity cases, which falls perfectly within  
 119 the observed anatomical bounds for initial and collecting lymphatic vessels [5, 6].

120 Using the estimation above, we can compute the effective permeability of the lym-  
121 phatic vessels as well using equation (16). We test the simulation with different  $\phi_L$   
122 and we notice that, as for the parameter  $L_p$ , what remains constant through different  
123 lymphatic permeabilities is the product  $P_{\text{eff}}S_{\text{mLV}} = 5.79 \times 10^{-9} \text{ m}^3/\text{s}$ . For model-  
124 ing purpose, we define the quantity  $\beta = \frac{P_{\text{eff}}S_{\text{mLV}}}{V_{\text{dura}}} \approx 0.228 \text{ 1/h}$ . By employing our  
125 estimated  $P_{\text{eff}}S_{\text{mLV}}$  and assuming a solute production rate of 3 g/day (equivalent to  
126 a flux of 0.0018 mmol/h), we obtain an interstitial concentration of approximately  
127 0.0864 mmol/L. This estimate is exceptionally consistent with the concentration values  
128 derived from the gMRI segmentation reported in the main text.

## 129 B Parameters exploration in a Two Compartment 130 ODE Model

131 We describe the tracer transport between the CSF compartment concentration  
132  $C_{\text{CSF}}(t)$  and the Dura compartment concentration in a simplified ODE model in the  
133 following way:

$$\frac{d\phi_{\text{CSF}}C_{\text{CSF}}}{dt} = -\alpha(C_{\text{CSF}} - C_D) - \bar{k}_{10}C_{\text{CSF}} + I(t), \quad (17)$$

$$\frac{d\phi_D C_D}{dt} = \alpha(C_{\text{CSF}} - C_D) - \bar{k}_D C_D, \quad (18)$$

135 where  $C_{\text{CSF}}(t)$  and  $C_D(t)$  are the concentrations in the whole CSF and dural com-  
136 partments, respectively,  $\alpha$  [ $\text{h}^{-1}$ ] is the influx rate constant (mass transfer coefficient)  
137 from CSF to the dura,  $\bar{k}_{10}$  [ $\text{h}^{-1}$ ] is the total efflux or clearance rate constant from the  
138 CSF,  $\bar{k}_D$  [ $\text{h}^{-1}$ ] is the total efflux or clearance rate constant from the dura,  $I(t)$  is the  
139 injection of gadobutrol in the CSF compartment (that needs to be modelize).

140 Initial conditions were set to  $C_{\text{CSF}}(0) = C_D(0) = 0$ .

141 Since we are not considering the space variable in this model, it is better to  
142 reformulate it in terms of amounts instead of concentrations

143

$$\frac{dA_1}{dt} = -(k_{12} + k_{10}) A_1 + k_{21} \frac{V_{\text{CSF}}}{V_D} A_2 + I(t), \quad (19)$$

$$\frac{dA_2}{dt} = k_{12} \frac{V_D}{V_{\text{CSF}}} A_1 - (k_{21} + k_D) A_2, \quad (20)$$

where  $A_1$  and  $A_2$  are the amounts (in mmol) of gadobutrol in the CSF and dura compartment, respectively;

$$k_{12} = \frac{\alpha}{\phi_{\text{CSF}}}, \quad k_{21} = \frac{\alpha}{\phi_D},$$

$$k_{10} = \frac{\bar{k}_{10}}{\phi_{\text{CSF}}}, \quad k_D = \frac{\bar{k}_D}{\phi_D},$$

and the injection is modeled as the best fit between the following models

$$I(t) = S_{\text{in}} t^{B_{\text{in}}} \exp(-t/C_{\text{in}}), \quad I(t) = S_{\text{in}} (\exp(-t/B_{\text{in}}) - \exp(-t/C_{\text{in}})).$$

144

## B.1 QMC Analysis

145

146

147

148

149

150

151

152

153

154

155

The search space consisted of seven dimensions representing the unknown parameters of the model:  $k_{10}$  (elimination from the CSF),  $k_{12}$  (transfer from CSF to Dura),  $k_{21}$  (return from Dura to CSF),  $k_D$  (clearance),  $S_{\text{in}}$  (scaling factor),  $B_{\text{in}}$  (first decay constant), and  $C_{\text{in}}$  (second decay constant). To reduce the number of dimensions for this analysis, the parameters  $S_{\text{in}}$ ,  $B_{\text{in}}$ , and  $C_{\text{in}}$  are fitted against the CSF concentration data and then we vary them of 10% to decrease the uncertainty given by these parameters. Moreover, we apply an optimization method (L-BFGS-B) to the 90% confidence interval found by the Montecarlo simulations to obtain the parameters that best fit the results in that range. To evaluate the goodness-of-fit for each simulated trajectory against the experimental data, a Normalized Sum of Squared Residuals (SSR) was computed.

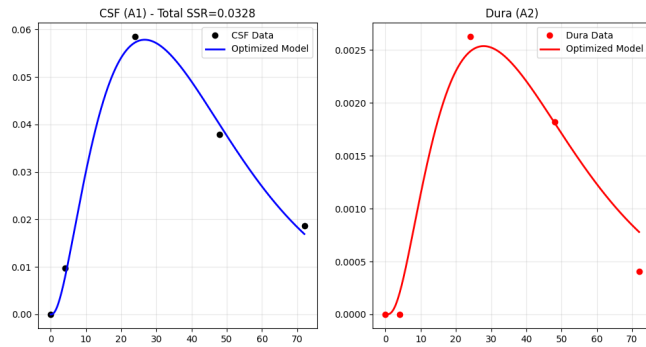

**Fig. C:** The best fit models of the two compartment (without the 4h data point)

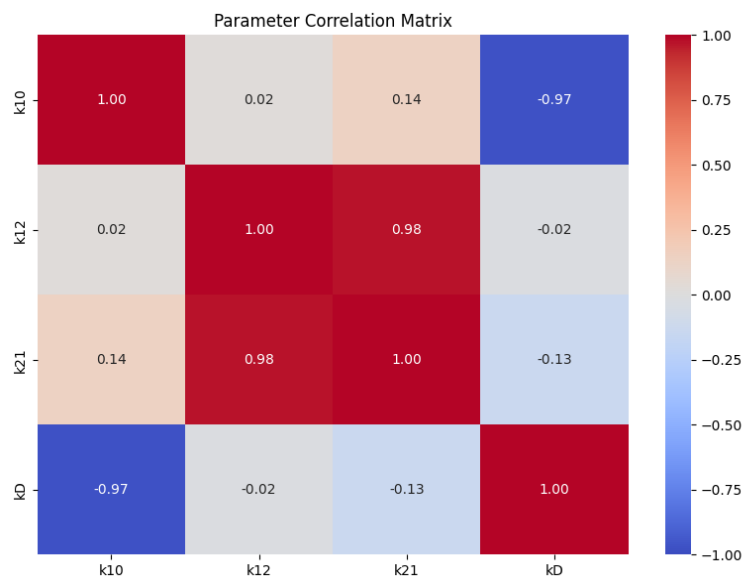

**Fig. D:** The correlation matrix of the 0D model.

156 The refined two-compartment model, successfully captured the macroscopic tissue  
 157 kinetics with a final optimized Sum of Squared Residuals (SSR) of 0.0328 (see Figure  
 158 C). Moreover, Figure D shows the correlation matrix between the parameters.

159 The QMC analysis of the model (19) – (20) provided a rigorous assessment of  
 160 the practical identifiability of the physiological parameters. The statistical analy-  
 161 sis revealed remarkably low Spearman sensitivities to the cost function across all  
 162 parameters ( $|\rho| < 0.05$ ). Consequently, the QMC 95% confidence intervals remained  
 163 exceptionally broad for both the exchange rates (e.g.,  $k_{21} \in [0.0001, 77.03] \text{ h}^{-1}$ ) and  
 164 the elimination pathways (e.g.,  $k_D \in [0.0002, 6.79] \text{ h}^{-1}$ ). However, this apparent lack  
 165 of individual parameter identifiability is fundamentally explained by the presence of  
 166 strong compensatory processes within the system, as evidenced by the Pearson corre-  
 167 lation matrix. Specifically, we observed a near-perfect negative correlation between the  
 168 two elimination pathways ( $k_{10}$  and  $k_D$ ,  $r \approx -0.97$ ), indicating that the model easily  
 169 compensates for a lower direct CSF clearance by increasing dural clearance to maintain  
 170 the overall systemic elimination rate. Similarly, a highly significant positive correla-  
 171 tion was found between the compartment exchange rates ( $k_{12}$  and  $k_{21}$ ,  $r \approx 0.98$ ).  
 172 While this strong coupling renders the exact individual magnitudes of  $k_{12}$  and  $k_{21}$   
 173 difficult to isolate independently, it carries critical physiological significance, but their  
 174 ratio  $k_{12}/k_{21}$  is identifiable and it corresponds to the physiological parameter ratio  
 175  $\eta = \phi_D/\phi_{\text{CSF}}$ . Due to the broad parameter results range,  $\eta \in [0.18, 244]$ ; removing the  
 176 non-physiological values, we restrict the parameter interval at  $\eta \in [0.18, 0.6]$ .

## 177 **C Parameter Exploration in a One-Dimensional One** 178 **Compartment PDE Model**

### 179 **C.1 Model**

180 The transport of the solute is modeled within a spherically symmetric, single-porosity  
 181 domain representing the tissue layer.

182 The geometric domain is defined as a spherical shell bounded by an inner radius  
 183  $R_1$  and an outer radius  $R_2$ . Assuming spherical symmetry, the concentration profile

184  $C(r, t)$  varies only with the radial distance  $r \in [R_1, R_2]$  and time  $t$ . The values of  $R_1$   
 185 and  $R_2$  were found such that  $R_2 - R_1 \approx 1$  mm (approximately the thickness of the  
 186 dura [7]) and a volume of  $V_D \approx 0.0914$  L (found by the segmentation presented in  
 187 Section 2.2). With these constrains, we found  $R_1 = 0.848$  dm and  $R_2 = 0.858$  dm.

188 The solute concentration  $C(r, t)$  is governed by a one-dimensional radial reaction-  
 189 diffusion equation. The model accounts for Fickian diffusion and a volumetric clearance  
 190 (sink) term. The governing partial differential equation (PDE) is given by:

$$\frac{\partial C}{\partial t} = \nabla \cdot (D_D \nabla C) - \frac{K_D}{\phi} C; \quad (21)$$

191 expanded in spherical coordinates, this yields:

$$\frac{\partial C}{\partial t} = \frac{D_D}{r^2} \frac{\partial}{\partial r} \left( r^2 \frac{\partial C}{\partial r} \right) - \frac{K_D}{\phi} C, \quad (22)$$

192 where  $D_D$  is the effective diffusion coefficient ( $\text{dm}^2/\text{h}$ ) that describes the diffusion  
 193 and eventually the dispersion in the whole dura (including the venous and lymphatic  
 194 vessels) and  $K_D$  is the clearance coefficient ( $\text{h}^{-1}$ ).

195 **Inner Boundary** ( $r = R_1$ ): Transport across the inner surface is dictated  
 196 by a permeability coefficient  $P$  ( $\text{dm}/\text{h}$ ). This is represented as a Robin (mixed)  
 197 boundary condition where the diffusive flux matches the permeable flux driven by  
 198 the concentration difference between the CSF driver  $C_{\text{CSF}}(t)$  and the tissue surface  
 199  $C(R_1, t)$ :

$$-D_D \frac{\partial C}{\partial r} \Big|_{r=R_1} = \frac{P}{\phi} (\eta C_{\text{CSF}}(t) - C(R_1, t)), \quad (23)$$

where  $\eta = \phi_D / \phi_{\text{CSF}}$ . The CSF input function  $C_{\text{CSF}}(t)$  is defined empirically using  
 best fit between the following models

$$I(t) = S_{\text{in}} t^{B_{\text{in}}} \exp(-t/C_{\text{in}}), \quad C_{\text{CSF}}(t) = S_{\text{in}} (\exp(-t/B_{\text{in}}) - \exp(-t/C_{\text{in}})),$$

200 where  $S_{\text{in}}$ ,  $B_{\text{in}}$ , and  $C_{\text{in}}$  are fixed parameters derived from prior curve fitting.

201 **Outer Boundary** ( $r = R_2$ ): The outer boundary is assumed to be strictly  
202 impermeable, yielding a homogeneous Neumann (no-flux) boundary condition:

$$\left. \frac{\partial C}{\partial r} \right|_{r=R_2} = 0. \quad (24)$$

203 **Initial Condition** ( $t = 0$ ): The tissue is assumed to be initially free of the solute,  
204 yielding:

$$C(r, 0) = 0 \quad \text{for} \quad R_1 \leq r \leq R_2 \quad (25)$$

205 To compare the continuous spatial model against bulk empirical data, the observ-  
206 able concentration is defined as the volume-weighted average of  $C(r, t)$  across the  
207 entire spherical shell:

$$\bar{C}(t) = \frac{1}{V_{\text{total}}} \int_{R_1}^{R_2} C(r, t) \cdot 4\pi r^2 dr \quad (26)$$

208 where  $V_{\text{total}} = \frac{4}{3}\pi(R_2^3 - R_1^3)$  is the total volume of the domain. This  $\bar{C}(t)$  is subse-  
209 quently used to compute the objective function (Normalized Root Mean Square Error)  
210 during the parameter optimization process. We run QMC to estimate parameters 95  
211 % confidence intervals. We can see the results in Table C.

## 212 C.2 QMC analysis and Results

213 We rely on the QMC method with Halton sequence to estimate the parameters  $D_D$ ,  
214  $K_D/\phi$ , and  $P/\phi$ . We choose as parameter range the following (motivated by biology  
215 and range found in the 0D model of Section B):  $D_D \in [1 \times 10^{-5}, 5 \times 10^{-3}] \text{ dm}^2/\text{h}$   
216  $[8-10]$ ,  $P/\phi \in [10^{-4}, 100] \text{ dm}/\text{h}$ ,  $K_D/\phi \in [10^{-4}, 100] \text{ 1}/\text{h}$ , and  $\eta \in [0.18, 0.6]$ .

217 To ensure a comprehensive and physiologically relevant exploration of the 1D  
218 diffusion-reaction model, the parameter search space was constrained using insights  
219 from the prior 0D compartmental analysis. Specifically, the search boundaries for the

220 effective clearance rate ( $K_D/\phi$ ) and the effective boundary permeability ( $P/\phi$ ) were  
 221 informed directly by the confidence intervals of their macroscopic analogs derived from  
 222 the 0D model. Conversely, the limit for the internal diffusion coefficient ( $D_D$ ) was set  
 223 broad enough to allow the numerical solver to freely explore both extreme diffusion-  
 224 limited and permeability-limited (well-mixed) transport regimes, but the extrema were  
 225 set inspired by biological limit [9–11].

226 The optimal parameter set for the 1D diffusion-reaction model yielded a minimum  
 227 Sum of Squared Residuals (SSR) of approximately 0.068. To assess the structural  
 228 identifiability and robustness of these estimates, a subset analysis was performed on  
 229 the top 250 model fits. The statistical summary of the physical and derived parameters  
 230 is presented in Table C.

**Table C:** Statistical Summary of Estimated Parameters (Top 250 Fits). CV denotes the Coefficient of Variation ( $SD/Mean$ ), serving as a metric for parameter identifiability.

| Parameter                                   | Symbol     | Mean                  | Std. Dev.             | Median                | Rel. IQR | CV (%) |
|---------------------------------------------|------------|-----------------------|-----------------------|-----------------------|----------|--------|
| Permeability (dm/h)                         | $P/\phi$   | 0.0040                | 0.0015                | 0.0039                | 0.703    | 38.6%  |
| Partition Coeff. (-)                        | $\eta$     | 0.3186                | 0.1290                | 0.2800                | 0.751    | 40.5%  |
| Clearance Rate ( $\text{h}^{-1}$ )          | $K_D/\phi$ | 0.2129                | 0.1363                | 0.2175                | 1.173    | 64.1%  |
| Diffusion Coeff. ( $\text{dm}^2/\text{h}$ ) | $D_D$      | $1.14 \times 10^{-3}$ | $1.26 \times 10^{-3}$ | $5.29 \times 10^{-4}$ | 3.025    | 110.8% |

**Table D:** Statistical Summary of Estimated Parameters (Top 250 Fits). CV denotes the Coefficient of Variation ( $SD/Mean$ ). Results refer to the single-compartment model with fixed  $\eta = 0.3186$ .

| Parameter                                   | Symbol     | Mean                  | Std. Dev.             | Median                | Rel. IQR | CV (%) |
|---------------------------------------------|------------|-----------------------|-----------------------|-----------------------|----------|--------|
| Clearance Rate ( $\text{h}^{-1}$ )          | $K_D/\phi$ | 0.2466                | 0.0169                | 0.2463                | 0.108    | 6.8%   |
| Permeability (dm/h)                         | $P/\phi$   | 0.0037                | 0.0003                | 0.0037                | 0.133    | 9.4%   |
| Diffusion Coeff. ( $\text{dm}^2/\text{h}$ ) | $D_D$      | $1.16 \times 10^{-3}$ | $1.29 \times 10^{-3}$ | $6.03 \times 10^{-4}$ | 2.617    | 110.7% |

231 The correlation matrix of Figure E reveals high correlation between the parameters  
 232  $P$ ,  $\eta$ , and  $K_D$ . The correlation between  $P$  and  $\eta$  is given by the product  $P\eta$  at the

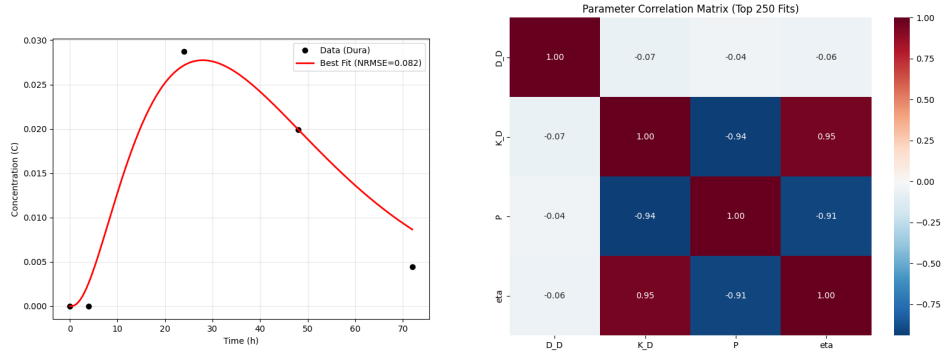

**Fig. E:** **Left:** The best fit models of the 1 compartment model on a sphere. **Right:** The correlation matrix of the spherical 1 compartment model.

233 boundary condition. By fixing the partition coefficient at its mean value ( $\eta = 0.3186$ ),  
 234 we successfully decoupled the boundary dynamics, yielding high identifiability for the  
 235 clearance rate ( $K_D$ ) and permeability ( $P$ ), which exhibit low Coefficients of Variation  
 236 (6.8% and 9.4%, respectively, see Table D). This stability confirms that the previously  
 237 observed uncertainties were primarily numerical artifacts of the  $P$ - $\eta$  correlation.

238 The parameter correlation matrix highlights a strong positive coupling between  $K_D$   
 239 and  $P$  ( $r = 0.738$ ). This relationship elucidates a fundamental physiological trade-off:  
 240 higher dural permeability, which increases tracer influx, must be balanced by a pro-  
 241 portionally higher clearance rate to accurately replicate the washout decay observed  
 242 in clinical data. This compensatory mechanism ensures that the model preserves the  
 243 mass balance and the observed peak timing, regardless of the individual parameter  
 244 magnitudes.

245 The internal diffusion estimation  $D_D \approx 1.16 \times 10^{-3} \text{ dm}^2/\text{h}$  presents high uncer-  
 246 tainty ( $CV > 100\%$ ), but it offers a value higher than the gadobutrol diffusion in free  
 247 water of  $\approx 1.37 \times 10^{-4} \text{ dm}^2/\text{h}$ , suggesting that the only-diffusion regime is not enough.

248 **D Parameter Exploration in a One-Dimensional Two**  
 249 **Compartment PDE Model**

250 **D.1 Model**

251 The transport of the solute is modeled within a spherically symmetric, double-porosity  
 252 domain representing the tissue layer. The geometric domain is defined as a spherical  
 253 shell bounded by an inner radius  $R_1$  and an outer radius  $R_2$ .

254 To account for the complex microstructure of the tissue, the continuum is divided  
 255 into two distinct, overlapping interacting compartments: the Dura ( $D$ ) and the Lymph  
 256 ( $L$ ). The concentration profiles for both compartments,  $C_D(r, t)$  and  $C_L(r, t)$ , vary  
 257 with the radial distance  $r \in [R_1, R_2]$  and time  $t$ .

258 In this model, we suppose that the entire clearance from the dura is given by  
 259 the mLVs direct towards the cervical lymphatic vessels. We suppose this to test if  
 260 it is possible to have a full clearance given by the lymphatics and to estimate the  
 261 parameters which make this possible.

262 The spatio-temporal evolution of the solute is governed by a coupled system of  
 263 one-dimensional radial reaction-diffusion equations.

264 For the primary tissue compartment (Dura,  $C_D$ ), transport is driven by Fickian  
 265 diffusion and mass exchange with the secondary compartment:

$$\frac{\partial C_D}{\partial t} = \frac{D_D}{r^2} \frac{\partial}{\partial r} \left( r^2 \frac{\partial C_D}{\partial r} \right) + \beta(\phi_R C_L - C_D), \quad (27)$$

266 For the secondary compartment (Lymph,  $C_L$ ), transport involves diffusion, the  
 267 reverse mass exchange, and a volumetric clearance (elimination) term:

$$\frac{\partial C_L}{\partial t} = \frac{D_L}{r^2} \frac{\partial}{\partial r} \left( r^2 \frac{\partial C_L}{\partial r} \right) - \beta(\phi_R C_L - C_D) - k_{\text{elim}} C_L \quad (28)$$

268 where  $D_D$  and  $D_L$  are the effective diffusion coefficients for the Dura and Lymph  
 269 compartments, respectively ( $\text{dm}^2/\text{h}$ ),  $\beta = \bar{\beta}/\phi_D$  is the exchange rate between the two

270 compartments ( $\text{h}^{-1}$ ),  $\phi_R = \phi_D/\phi_L$ ,  $\phi = \phi_D + \phi_L$  and  $\phi_D$  takes into consideration  
 271 the porosity of the dura matrix and the venous vessels inside the dura, and  $k_{\text{elim}} =$   
 272  $\bar{k}_{\text{elim}}/\phi_L$  is the lymphatic clearance coefficient given by cervical lymphatic vessels  
 273 ( $\text{h}^{-1}$ ).

274 **Inner Boundary ( $r = R_1$ ):** Transport from the CSF into the Dura compartment  
 275 is dictated by a permeability coefficient  $P = \bar{P}/\phi_D$  (dm/h). A scaling factor  $\eta_D =$   
 276  $\phi_D/\phi_{\text{CSF}}$  is applied to the CSF driving function. The Lymph compartment is assumed  
 277 to have no direct exchange with the CSF at this boundary.

$$-D_D \frac{\partial C_D}{\partial r} \Big|_{r=R_1} = P(\eta C_{\text{CSF}}(t) - C_D(R_1, t)), \quad (29)$$

$$-D_L \frac{\partial C_L}{\partial r} \Big|_{r=R_1} = 0. \quad (30)$$

278 The CSF input function  $C_{\text{CSF}}(t)$  is defined empirically using a bi-exponential  
 279 model:

$$C_{\text{CSF}}(t) = St^B t e^{-t/C_{\text{rate}}} \quad (31)$$

280 where  $S$ ,  $B$ , and  $C_{\text{rate}}$  are fixed parameters derived from prior data fitting.

281 **Outer Boundary ( $r = R_2$ ):** The outer boundary is assumed to be strictly imper-  
 282 meable for both compartments, yielding homogeneous Neumann (no-flux) boundary  
 283 conditions:

$$\frac{\partial C_D}{\partial r} \Big|_{r=R_2} = 0, \quad \frac{\partial C_L}{\partial r} \Big|_{r=R_2} = 0 \quad (32)$$

284 **Initial Condition ( $t = 0$ ):** Both compartments are assumed to be initially free  
 285 of the solute:

$$C_D(r, 0) = 0 \quad \text{and} \quad C_L(r, 0) = 0 \quad \text{for} \quad R_1 \leq r \leq R_2 \quad (33)$$

286 To evaluate the mathematical model against bulk tissue empirical data, the observ-  
 287 able concentration is defined as the sum of the volume-weighted averages of both  
 288 compartments across the entire spherical shell:

$$\bar{C}_{\text{Total}}(t) = \frac{1}{V_{\text{total}}} \int_{R_1}^{R_2} (C_D(r, t) + C_L(r, t)) \cdot 4\pi r^2 dr \quad (34)$$

289 where  $V_{\text{total}} = \frac{4}{3}\pi(R_2^3 - R_1^3)$  is the total volume of the domain. This aggregate  
 290  $\bar{C}_{\text{Total}}(t)$  is utilized to compute the objective function (Normalized Root Mean Square  
 291 Error) during Montecarlo simulations. We run QMC to estimate parameters 95 %  
 292 confidence intervals. We can see the results in Table ?? and the details about the  
 293 QMC sampling in Supplementary D.

## 294 D.2 QMC Analysis

295 The search space consisted of six dimensions representing the unknown parameters  
 296 of the model: the diffusion coefficient of the dura phase  $D_D$  ( $\text{dm}^2/\text{h}$ ), the dura-  
 297 lymphatic exchange  $\beta/\phi_D$  ( $1/\text{h}$ ), the porosity ratio  $\phi_R$ , the diffusion coefficient of the  
 298 lymph phase  $D_L$  ( $\text{dm}^2/\text{h}$ ), the volumetric sink  $k_{\text{elim}}/\phi_L$  ( $1/\text{h}$ ), and the permeability  
 299 between the dura and the CSF  $P/\phi_D$  ( $\text{dm}/\text{h}$ ). To have a parameter range that takes  
 300 into account the 1 dimensional 1 compartment model, the following relationship are  
 301 considered. First, we have that  $\frac{k_{\text{elim}}}{\phi_L} = \frac{K_D}{\phi}(\phi_R + 1)$ .

302 For the diffusion coefficients  $D_D$  and  $D_L$ , from the fact that the 1-compartment  
 303 diffusion coefficient  $D_D^{1\text{comp}} = \frac{\phi_D + \phi_L \gamma_L}{\phi_D + \phi_L} D$  where  $\gamma_L$  represents the enhancement dif-  
 304 fusion given by the convection in the lymphatics, we use the following relationship:  
 305  $D_L = D_D^{1\text{comp}}(\phi_R + 1) - \phi_R D_D$ , where  $D_D \in [2 \times 10^{-5}, 5 \times 10^{-5}] \text{ dm}^2/\text{h}$  adapted  
 306 from [12];  $\frac{k_{\text{elim}}}{\phi_L} \in [0.1(\phi_R + 1), 1(\phi_R + 1)]$ ,  $\phi_R = \phi_D/\phi_L$  supposing a bound for  $\phi_D$   
 307 similar to the gray matter ( $\approx 0.1 - 0.3$ ) and for  $\phi_L \in [0.005, 0.07]$ ,  $\phi_R \in [2, 60]$ , from

308 the (wider) 1-compartment model we have  $P/\phi \in [0.001, 0.1]$ , in our case we need  
 309  $\frac{P}{\phi_D} = \frac{P}{\phi} \left(1 + \frac{1}{\phi_R}\right)$ , the  $\eta_D = \frac{\phi_D}{\phi_{CSF}} = \eta \left(\frac{\phi_R}{\phi_R+1}\right)$  where  $\eta = \frac{\phi_D}{\phi_{CSF}}$  is given in the 1-  
 310 compartment model as  $\eta = 0.31$ , and  $\beta/\phi_D \in [0.5, 3]$  from Supplementary A and the  
 311 range for  $\phi_D$ .

312 The optimal parameter set for this double-porosity model yielded a minimum Sum  
 313 of Squared Residuals (SSR) of approximately 0.082. To assess structural identifiability  
 314 and the robustness of these constrained estimates, a subset analysis was performed on  
 315 the top 250 model fits (the upper 5% convergence region). The statistical summary of  
 316 the macroscopic and derived parameters is presented in Table E.

317 The estimated lymphatic diffusion coefficient ( $D_L \approx 1.69 \times 10^{-2} \text{ dm}^2/\text{h}$ ) is approx-  
 318 imately two orders of magnitude higher than the established free-water diffusion  
 319 coefficient of Gadobutrol ( $1.37 \times 10^{-4} \text{ dm}^2/\text{h}$ ). Such an unphysiologically high diffusiv-  
 320 ity suggests that the QMC algorithm is mathematically forcing the diffusion term to  
 321 compensate for macroscopic advective transport, which is inherently absent from the  
 322 current governing equations. This phenomenon strongly indicates that a pure diffusion  
 323 model is insufficient to fully capture the complex, rapid transport dynamics within the  
 324 dural lymphatic and vascular networks, pointing to advection-driven flow as a critical  
 325 mechanism that must be accounted for to accurately describe dural clearance.

326 To further validate whether this behavior was an artifact of boundary conditions,  
 327 we tested the model using a different partition coefficient ( $\eta = 0.18$ ). As anticipated  
 328 from the parameter coupling observed in the single-compartment analysis presented in  
 329 Supplementary C, modifying  $\eta$  induced expected proportional shifts in the boundary  
 330 permeability ( $P$ ) and elimination ( $k_{elim}$ ) parameters to preserve the overall mass  
 331 balance. Crucially, however, the artificially high magnitude of  $D_L$  remained consistent.  
 332 This persistence confirms that the inflated  $D_L$  is not a numerical artifact driven by  
 333 boundary correlations, but rather a fundamental structural limitation.

**Table E:** Statistical Summary of Estimated Parameters for the 2-Compartment Model (Top 250 Fits). *CV* denotes the Coefficient of Variation ( $SD/Mean$ ), serving as a metric for parameter identifiability.

| Parameter                                | Symbol     | Mean                  | Std. Dev.             | Median                | Rel. IQR | CV (%) |
|------------------------------------------|------------|-----------------------|-----------------------|-----------------------|----------|--------|
| Permeability (dm/h)                      | $P$        | 0.0045                | 0.0003                | 0.0045                | 0.057    | 6.1%   |
| Primary Diffusion (dm <sup>2</sup> /h)   | $D_D$      | $4.50 \times 10^{-5}$ | $3.00 \times 10^{-6}$ | $4.60 \times 10^{-5}$ | 0.105    | 7.7%   |
| Exchange Rate (h <sup>-1</sup> )         | $\beta$    | 2.25                  | 0.51                  | 2.29                  | 0.334    | 22.6%  |
| Lymphatic Diffusion (dm <sup>2</sup> /h) | $D_L$      | $1.69 \times 10^{-2}$ | $7.87 \times 10^{-3}$ | $1.76 \times 10^{-2}$ | 0.752    | 46.6%  |
| Elimination Rate (h <sup>-1</sup> )      | $k_{elim}$ | 9.51                  | 4.48                  | 10.01                 | 0.733    | 47.1%  |
| Porosity Ratio (-)                       | $\phi$     | 33.79                 | 16.24                 | 35.37                 | 0.764    | 48.1%  |

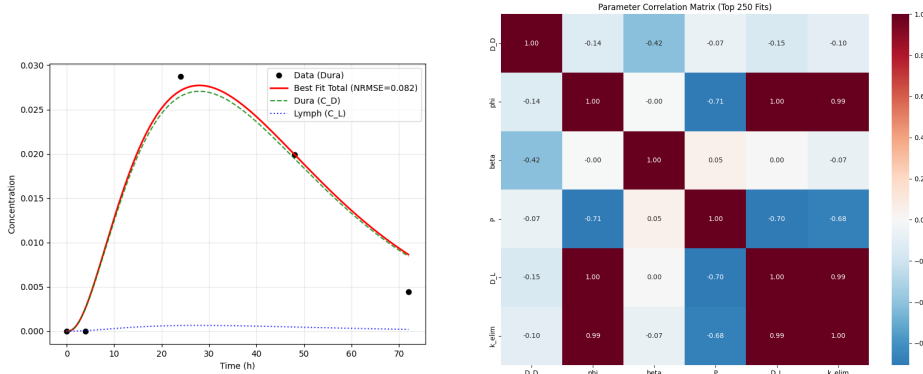

**Fig. F:** Left: The best fit models of the 2 compartment model on a sphere. Right: The correlation matrix of the spherical 2 compartment model.

## 334 E Dura and Lymphatic Permeabilities

Using the explicit formula for the permeability  $K = \frac{Q\Delta x}{A\Delta p}$ , we have that that  $A = V/\Delta x$ , using the  $V = 9.489 \times 10^{-5} \text{ m}^3$  and  $\Delta x = 0.001 \text{ m}$ , assuming a flux of  $Q = 0.5 \text{ L/day} \approx 5.8 \times 10^{-9} \text{ m}^3/\text{s}$ , we have the relationship

$$K_D = \mu K = \frac{4.28 \times 10^{-14}}{\Delta P}.$$

335 Using the data estimated in Supplementary A, we have an estimated permeability  
 336 value of  $K_D \approx 5.2 \times 10^{-17} \text{ m}^2$ .

337 Using the same approach, we can estimate the permeability of the mLVs as well.  
 338 For the mLVs we need to consider that the flow goes in the "polar" direction, hence  
 339 we have that as characteristic length we use an average value of  $L \approx 10$  cm; Moreover,  
 340 we assume that the pressure at the upper part of the brain is  $\approx 1.4 \times 10^3$  Pa [13] and  
 341 is 0 Pa in the exit region of the brain (cervical lymphatic vessels) [14, 15]; these lead to  
 342 a permeability of  $K_L \approx 2.39 \times 10^{-13}$  m<sup>2</sup>, smaller of one order of magnitude to the one  
 343 found using an homogenization modeling approach in dermal lymphatic capillaries in  
 344 [16].

## 345 F mLV Volume

We assume that the meningeal lymphatic vessels absorb all the fluid produced by the brain over one day ( $Q_{\text{prod}} \approx 0.5$  L/day  $\approx 5.79 \times 10^{-9}$  m<sup>3</sup>/s). Furthermore, the average velocity in the basal mLVs is  $\bar{v} \approx 2.2 - 2.7$  mm/s [17]. Using these data and assuming a spherical brain, we can estimate the porosity of the mLVs to be

$$\phi_L \approx \frac{Q_{\text{prod}}}{\bar{v}A_{\perp}} \approx 0.005 - 0.015 = 0.5\% - 1.5\%.$$

346 This value is lower respect to the porosity found of the dermal lymphatic vessels  
 347 [16] ( $\approx 5 - 20\%$ ). It follows that the mLVs volume is  $V_{\text{mLV}} \approx 4.57 \times 10^{-7} - 1.37 \times$   
 348  $10^{-6}$  m<sup>3</sup>. Assuming a spherical shell geometry for the dura, the cross-sectional area  $A_{\perp}$   
 349 perpendicular to the polar lymph flow is given by  $A_{\perp} = V_{\text{dura}}/L$ , where  $L$  represents  
 350 the characteristic path length of the mLV (in polar direction, way through the cervical  
 351 lymphatic vessels), and  $V_{\text{dura}}$  is the total volume.

352 In [4] they measured the volume of the meningeal lymphatic vessels and the venous  
 353 vessels inside the dura. We have that the average volume of the mLV is  $V_{\text{mLV}} \approx$   
 354  $6 \times 10^{-6}$  m<sup>3</sup>, which means a porosity of the mLV of  $\phi_L \approx 0.063$ . In [4] they did not  
 355 measure the volume of the smaller mLVs found in [5], that represents a very small

356 fraction of the mLVs. Hence we can estimate that the porosity of the mLVs to be  
 357 between 0.065 – 0.07. Due to the uncertainty of these values, in this work we will  
 358 consider a range for the porosity of the mLVs between 0.5 – 7%.

## 359 G Structural Identifiability and the Role of Local 360 Dural Clearance ( $k_D$ )

361 To evaluate the impact of alternative drainage pathways, an extended formulation of  
 362 the model was tested, incorporating a non-specific dural clearance parameter ( $k_D$ )  
 363 adding the term  $-\frac{k_D}{\phi_D}C_{D,i}$  to equation (2) of the main text. This parameter simulates  
 364 the local reabsorption of the tracer in the dura mater without entering the lym-  
 365 phatic system, thereby acting in competition with the macroscopic lymphatic drainage  
 366 towards the deep cervical lymph nodes ( $P_{DcLV}$ ).

367 The Quasi-Monte Carlo (QMC) simulations of the extended model yielded an  
 368 excellent experimental fit, with an optimal loss function (SSR = 0.055) identical to  
 369 that of the base model presented in the main text. The ensemble statistics for this  
 370 competitive scenario are detailed in Table F.

**Table F:** Optimal parameters and derived quantities (Top 200 QMC ensemble) for the extended model including local dural clearance ( $k_D$ ).

| Parameter                       | Unit               | Median  | IQR [25%, 75%]     | 95% CI              |
|---------------------------------|--------------------|---------|--------------------|---------------------|
| <i>Model Parameters</i>         |                    |         |                    |                     |
| Partition Coeff. ( $\phi$ )     | [-]                | 7.69    | [3.74, 14.57]      | [2.26, 33.58]       |
| CSF Permeability ( $P_{bot}$ )  | [h <sup>-1</sup> ] | 0.434   | [0.351, 0.557]     | [0.239, 0.829]      |
| Dispersion Coeff. ( $D_L$ )     | [-]                | 0.0006  | [0.0001, 0.0020]   | [0.00001, 0.0043]   |
| Deep Clearance ( $P_{DcLV}$ )   | [h <sup>-1</sup> ] | 5.84    | [0.085, 22.65]     | [0.001, 231.54]     |
| Dural Clearance ( $k_D$ )       | [h <sup>-1</sup> ] | 1.04    | [0.086, 1.55]      | [0.0002, 2.24]      |
| Lymphatic Porosity ( $\phi_L$ ) | [-]                | 0.026   | [0.013, 0.042]     | [0.006, 0.066]      |
| <i>Derived Quantities</i>       |                    |         |                    |                     |
| Péclet Number ( $Pe$ )          | [-]                | 54.22   | [16.52, 513.74]    | [2.92, 15855.82]    |
| Biot Number ( $Bi$ )            | [-]                | 177.21  | [143.23, 227.44]   | [70.28, 458.45]     |
| Advection Time ( $T_{adv}$ )    | [h]                | 59.09   | [28.95, 94.69]     | [11.75, 154.43]     |
| Diffusion Time ( $T_{diff}$ )   | [h]                | 3419.89 | [999.64, 23042.68] | [430.72, 201782.79] |

## 371 **G.1 Discussion of Results and Equifinality**

372 The inclusion of  $k_D$  significantly alters the hydrodynamic balance of the system. By  
373 allowing the dura mater to act as a local clearance pathway (with an estimated half-life  
374 of approximately 6.3 hours,  $k_D \approx 0.11 \text{ h}^{-1}$ ), the burden on the lymphatic system is  
375 drastically reduced. Consequently, the model predicts a slower advection time ( $T_{adv} \approx$   
376 46.7 h) and a markedly reduced basal clearance  $P_{DcLV}$ . Nevertheless, the transport  
377 regime within the lymphatic vessels remains undeniably dominated by convection, as  
378 confirmed by a median Péclet number firmly greater than unity ( $Pe \approx 54.22$ ).

379 Despite the physiological plausibility of this extended scenario, the simultaneous  
380 inclusion of  $k_D$  and  $P_{DcLV}$  introduces a well-known mathematical issue of *structural*  
381 *identifiability* (equifinality). Because contrast-enhanced MRI captures the global signal  
382 decay within a voxel but lacks the resolution to differentiate the specific molecular exit  
383 route or distinguish between interstitial or lymphatic enrichment, the QMC analysis  
384 can seamlessly compensate for an increase in one clearance parameter by decreasing  
385 the other, without altering the Sum of Squared Residuals (SSR).

## 386 **G.2 Justification for the Base Model**

387 In light of this, the model imposing  $k_D = 0$  was adopted for the main text. Through  
388 this choice, the meningeal lymphatic network is forced to handle 100% of the tracer  
389 clearance.

390 This approach allows us to test the theoretical maximum capacity of the lymphatic  
391 network under a "worst-case scenario" approach. The results presented in the main  
392 text demonstrate that, even under this extreme load, the lymphatic system is physi-  
393 cally capable of clearing the entire tracer volume using geometrically, physiologically,  
394 and anatomically realistic parameters. Therefore, the base model provides robust,  
395 independent computational validation of the clinical hypothesis that the meningeal

396 lymphatic network possesses sufficient hydraulic capacity to be the primary driver of  
397 brain clearance.

## 398 Data Availability

399 All the code and setup used in this supplementary material is available upon request.

## 400 References

- 401 [1] Mendoza, E., Schmid-Schönbein, G.W.: A model for mechanics of primary lym-  
402 phatic valves. *Journal of Biomechanical Engineering* **125**(3), 407–414 (2003)  
403 <https://doi.org/10.1115/1.1568128>
- 404 [2] Koch, T., Vinje, V., Mardal, K.: Estimates of the permeability of extra-cellular  
405 pathways through the astrocyte endfoot sheath. *Fluids and Barriers of the CNS*  
406 **20**(20) (2023) <https://doi.org/10.1186/s12987-023-00421-8>
- 407 [3] Pardridge, W.M.: Csf, blood-brain barrier, and brain drug delivery. *Expert*  
408 *Opin Drug Deliv* **13**(7), 963–975 (2016) [https://doi.org/10.1517/17425247.2016.](https://doi.org/10.1517/17425247.2016.1171315)  
409 [1171315](https://doi.org/10.1517/17425247.2016.1171315)
- 410 [4] Jacob, L., Brito Neto, J., Lenck, S., Corcy, C., Benbelkacem, F., Geraldo, L.H.,  
411 Xu, Y., Thomas, J.M., El Kamouh, M.R., Spajer, M., Potier, M.C., Haik, S.,  
412 Kalamarides, M., Stankoff, B., Lehericy, S., Eichmann, A., Thomas, J.L.: Con-  
413 served meningeal lymphatic drainage circuits in mice and humans. *The Journal*  
414 *of experimental medicine* **219** (2022) <https://doi.org/10.1084/jem.20220891>
- 415 [5] Vera Quesada, C.L., Rao, S.B., Torp, R., Eide, P.K.: Widespread distribution of  
416 lymphatic vessels in human dura mater remote from sinus veins. *Frontiers in Cell*  
417 *and Developmental Biology* **Volume 11 - 2023** (2023) [https://doi.org/10.3389/](https://doi.org/10.3389/fcell.2023.1228344)  
418 [fcell.2023.1228344](https://doi.org/10.3389/fcell.2023.1228344)

- 419 [6] Çavdar, S., Köse, B., Altınöz, D., Söyler, G., Cingöz, A., Gürses, .I.A., Özkan,  
420 M., Aşilyüksek, H., Çakır, H.: Lymphatic vessels accompanying dorsal and basal  
421 dural sinuses in the human brain. *Journal of Chemical Neuroanatomy* **134**, 102357  
422 (2023) <https://doi.org/10.1016/j.jchemneu.2023.102357>
- 423 [7] Protasoni, M., Sangiorgi, S., Cividini, A., Culivaris, G.T., Tomei, G., Dell’Orbo,  
424 C., Raspanti, M., Balbi, S., Reguzzoni, M.: The collagenic architecture of human  
425 dura mater. *J Neurosurg* **114**, 1723–1730 (2011) [https://doi.org/10.3171/2010.](https://doi.org/10.3171/2010.12.JNS101732)  
426 [12.JNS101732](https://doi.org/10.3171/2010.12.JNS101732)
- 427 [8] Riseth, J.N., Koch, T., Lian, S.L., Holck Storås, T., Zikatanov, L.T., Valnes,  
428 L.M., Nordengen, K., Mardal, K.-A.: Human brain MRI data of intrathecally  
429 injected tracer evolution over 72 hours for data-integrated simulations. *Scientific*  
430 *Data* (2026)
- 431 [9] Riseth, J.N., Koch, T., Mardal, K.-A.: Two-compartment modeling of tracer  
432 transport in the brain. In: Dokken, J.S., Mardal, K.-A., Rognes, M.E., Valnes,  
433 L.M., Vinje, V. (eds.) *Mathematical Modelling of the Human Brain II: From*  
434 *Glymphatics to Deep Learning*, pp. 105–122. Springer, ??? (2025)
- 435 [10] Hornkjøl, M., Valnes, L.M., Dokken, J.S.: Segmenting, meshing, and modeling  
436 CSF spaces. In: Dokken, J.S., Mardal, K.-A., Rognes, M.E., Valnes, L.M., Vinje,  
437 V. (eds.) *Mathematical Modelling of the Human Brain II: From Glymphatics to*  
438 *Deep Learning. Simula SpringerBriefs on Computing*, vol. 18, pp. 35–46. Springer,  
439 Cham (2026). [https://doi.org/10.1007/978-3-032-00679-0.3](https://doi.org/10.1007/978-3-032-00679-0_3)
- 440 [11] Riseth, J., Koch, T., Lian, S., Storås, T., Zikatanov, L.T., Valnes, L.M., Norden-  
441 gen, K., Mardal, K.-A.: The Gonzo Dataset: Human Brain MRI Data of CSF  
442 Tracer Evolution Over 72h For Data-Integrated Simulations. [https://doi.org/10.](https://doi.org/10.5281/zenodo.14266867)  
443 [5281/zenodo.14266867](https://doi.org/10.5281/zenodo.14266867) . <https://doi.org/10.5281/zenodo.14266867>

- 444 [12] Bashkatov, A.N., Genina, E.A., Sinichkin, Y.P., Kochubey, V.I., Lakodina, N.A.,  
445 Tuchin, V.V.: Glucose and mannitol diffusion in human dura mater. *Biophys-*  
446 *ical Journal* **85**(5), 3310–3318 (2003) [https://doi.org/10.1016/S0006-3495\(03\)](https://doi.org/10.1016/S0006-3495(03)74750-X)  
447 [74750-X](https://doi.org/10.1016/S0006-3495(03)74750-X)
- 448 [13] Vinje, V., Eklund, A., Mardal, K., Rognes, M., Støverud, K.: Intracranial pressure  
449 elevation alters csf clearance pathways. *Fluids and Barriers of the CNS* **17** (2020)  
450 <https://doi.org/10.1186/s12987-020-00189-1>
- 451 [14] Kim, D., Tithof, J.: Lumped parameter simulations of cervical lymphatic vessels:  
452 dynamics of murine cerebrospinal fluid efflux from the skull. *Fluids and Barriers*  
453 *of the CNS* **21** (2024) <https://doi.org/10.1186/s12987-024-00605-w>
- 454 [15] Kim, D., Tithof, J.: Fluid-structure interaction dynamics  
455 of cervical lymphatic vessel pumping and valvular func-  
456 tion. *bioRxiv* (2025) <https://doi.org/10.1101/2025.11.21.689846>  
457 <https://www.biorxiv.org/content/early/2025/11/25/2025.11.21.689846.full.pdf>
- 458 [16] Roose, T., Swartz, M.A.: Multiscale modeling of lymphatic drainage from tis-  
459 sues using homogenization theory. *Journal of Biomechanics* **45**(1), 107–115 (2012)  
460 <https://doi.org/10.1016/j.jbiomech.2011.09.015>
- 461 [17] Kim, J., Yoo, R., Choi, S.H., Park, S.: Non-invasive flow mapping of parasagittal  
462 meningeal lymphatics using 2d interslice flow saturation MRI. *Fluids and Barriers*  
463 *of the CNS* **20** (2023) <https://doi.org/10.1186/s12987-023-00446-z>
